# Supplementary material
Source: PubMed Central journal article supplement (PMC10288446)
Supplement: bc3c00174_si_001.pdf [file bc3c00174_si_001.pdf]

# Supporting Information

## PEGylated Lipid Nanoparticle Formulations: Immunological Safety and Efficiency Perspective

Rumiana Tenchov, Janet M. Sasso, Qiongqiong Angela Zhou\*

CAS, a division of the American Chemical Society  
2540 Olentangy River Rd, Columbus, OH 43202, USA

\*Corresponding author: [gzhou@cas.org](mailto:gzhou@cas.org)

### Contents:

**Table S1.** PEG-lipid representatives used in LNPs as found in CAS Content Collection with structures and the respective number of documents

**Table S2.** Exemplary clinical trials researching PEGylated lipid formulations safety

**Table S1.** PEG-lipid representatives used in LNPs as found in CAS Content Collection with structures and the respective number of documents

| PEG-Lipid                                     | Common name | Chemical structure                                                                   | CAS Registry Number | All documents # | Patents # |
|-----------------------------------------------|-------------|--------------------------------------------------------------------------------------|---------------------|-----------------|-----------|
| <b>PEG-phosphatidylethanolamines (PEG-PE)</b> |             |                                                                                      |                     |                 |           |
| Dilauroyl (12:0/12:0) PE-PEG                  | DLPE-PEG    | 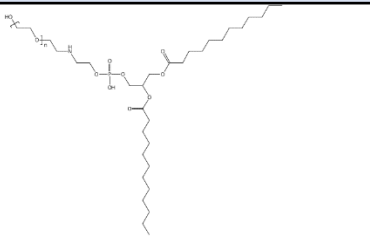 | 2055341-27-8        | 4               | 4         |

|                                                 |            |                                                                                      |                             |      |     |
|-------------------------------------------------|------------|--------------------------------------------------------------------------------------|-----------------------------|------|-----|
| Dimyristoyl (14:0/14:0) PE-PEG                  | DMPE-PEG   | 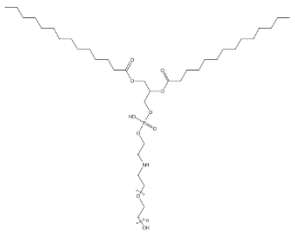   | 211567-66-7;<br>211733-74-3 | 107  | 53  |
| Dipalmitoyl (16:0/16:0) PE-PEG                  | DPPE-PEG   |    | 145035-97-8;<br>170931-03-0 | 267  | 142 |
| Distearoyl (18:0/18:0) PE-PEG                   | DSPE-PEG   |    | 145035-96-7;<br>170931-04-1 | 1841 | 799 |
| Oleoyl-Palmitoyl (18:1c9/16:0) PE-PEG           | OPPE-PEG   |   | 170127-34-1                 | 6    | 5   |
| Dioleoyl (18:1c9/18:1c9) PE-PEG                 | DOPE-PEG   |  | 145035-95-6;<br>262601-19-4 | 116  | 60  |
| Dilinoleoyl (18:2c9,12/18:2c9,12) PE-PEG        | DLinPE-PEG |  | 736998-47-3                 | 4    | 4   |
| <b>mPEG-phosphatidylethanolamines (mPEG-PE)</b> |            |                                                                                      |                             |      |     |
| Dimyristoyl (14:0/14:0) PE-mPEG                 | DMPE-mPEG  |  | 474922-82-2;<br>261764-82-3 | 101  | 65  |

|                                        |                                 |                                                                                      |                                                             |      |     |
|----------------------------------------|---------------------------------|--------------------------------------------------------------------------------------|-------------------------------------------------------------|------|-----|
| Dipalmitoyl (16:0/16:0) PE-mPEG        | DPPE-mPEG                       | 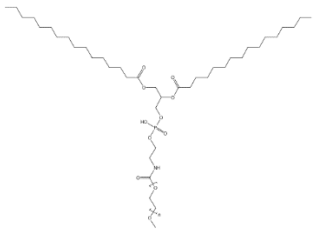   | 205494-72-0                                                 | 91   | 50  |
| Distearoyl (18:0/18:0) PE-mPEG         | DSPE-mPEG                       |    | 156543-00-9;<br>247925-28-6;<br>474922-77-5;<br>459428-35-4 | 2015 | 614 |
| Dioleoyl (18:1c9/18:1c9) PE-mPEG       | DOPE-mPEG                       |    | 226940-29-0                                                 | 53   | 26  |
| <b>mPEG-glycerides</b>                 |                                 |                                                                                      |                                                             |      |     |
| Dimyristoyl (14:0/14:0) glycerol-mPEG  | DMG-PEG                         |   | 160743-62-4;<br>1397695-86-1                                | 556  | 429 |
| Dipalmitoyl (16:0/16:0) glycerol-mPEG  | PDG-PEG                         |  | 162409-28-1                                                 | 31   | 25  |
| Distearoyl (18:0/18:0) glycerol-mPEG   | DSG-PEG;<br>Sunbright<br>DSG 2H |  | 308805-39-2;<br>850628-36-3                                 | 76   | 50  |
| Dioleoyl (18:1c9/18:1c9) glycerol-mPEG | DOG-PEG                         |  | 160743-61-3                                                 | 6    | 5   |
| <b>amino-mPEGs</b>                     |                                 |                                                                                      |                                                             |      |     |
| Dilauroyl (12:0/12:0) amino-PEG        |                                 |  | 1849616-44-9                                                | 2    | 2   |

|                                         |                          |                                                                                      |              |     |     |
|-----------------------------------------|--------------------------|--------------------------------------------------------------------------------------|--------------|-----|-----|
| Lauroyl-Myristoyl (12:0/14:0) amino-PEG |                          | 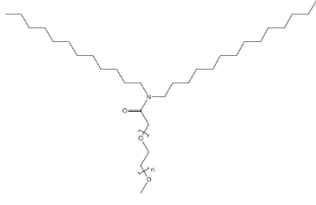   | 1849616-45-0 | 1   | 1   |
| Dimyristoyl (14:0/14:0) amino-PEG       | ALC-0159                 |    | 1849616-42-7 | 27  | 26  |
| Dipalmitoyl (16:0/16:0) amino-PEG       |                          |    | 1849616-43-8 | 2   | 2   |
| Distearoyl (18:0/18:0) amino-PEG        |                          |   | 741737-56-4  | 3   | 2   |
| <b>Chol-PEG</b>                         |                          |                                                                                      |              |     |     |
| Cholesterol-PEG                         | PEG-cholesterol          |  | 27321-96-6   | 626 | 460 |
| Cholesterol-mPEG                        | mPEG-cholesterol         |  | 99559-58-7   | 27  | 14  |
| Cholesterol-PEG-amine                   | Chol-PEG-NH <sub>2</sub> |  | 444045-24-3  | 11  | 3   |
| PEG-cholesteryl carbonate               | PEG-CHMC                 |  | 146185-41-3  | 5   | 1   |
| <b>mPEG-ceramides</b>                   |                          |                                                                                      |              |     |     |

|                                                                             |                             |                                                                                      |              |     |     |
|-----------------------------------------------------------------------------|-----------------------------|--------------------------------------------------------------------------------------|--------------|-----|-----|
| N-octanoyl-sphingosine-mPEG                                                 | C8 PEG<br>Ceramide          | 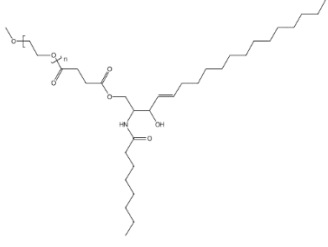   | 212116-76-2  | 31  | 20  |
| N-palmitoyl-sphingosine-mPEG                                                | C16 PEG<br>Ceramide         |    | 212116-78-4  | 85  | 38  |
| <b>Functionalized PEG-lipids</b>                                            |                             |                                                                                      |              |     |     |
| Dioleoyl-PE-N-[carbonyl-amino-PEG]                                          | DOPE-PEG<br>Amine           |    | 2342575-85-1 | 2   | 1   |
| Dioleoyl-PE-N-[acetyl-PEG-O-acetic acid]                                    | DOPE-PEG<br>Carboxylic acid |  | 2342575-87-3 | N/A | N/A |
| Bis-distearoyl-PE-N,N'-[diacetyl-PEG]                                       | Bis-DSPE<br>PEG             |  | 2260795-82-0 | N/A | N/A |
| Distearoyl-PE-N-[carbonyl-amino-PEG-N'-[4-(3-ethoxycyclobutane-1,2-dione)]] | DSPE-PEG-<br>square         |  | 2315262-14-5 | N/A | N/A |

| Alternatives: Polysarcosine Lipids                      |                   |                                                                                    |              |     |     |
|---------------------------------------------------------|-------------------|------------------------------------------------------------------------------------|--------------|-----|-----|
| N-tetradecyl polysarcosine                              |                   | 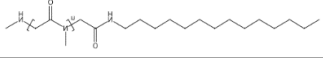 | 120468-71-5  | 2   | 1   |
| N-Hexadecyl polysarcosine                               |                   |  | 120468-76-0  | 2   | 1   |
| N,N-ditetradecylamine-N-succinyl[methyl(polysarcosine)] | N-Tetamine-pSar45 |  | 2847775-93-1 | N/A | N/A |

**Table S2.** Exemplary clinical trials researching PEGylated lipid formulations safety

| Clinical Trial Identifier                   | Intervention | Active Ingredient                  | Indication for use                                     | Immuno-induced adverse effects |
|---------------------------------------------|--------------|------------------------------------|--------------------------------------------------------|--------------------------------|
| NCT00826085                                 | ThermoDox    | Doxorubicin                        | Breast Cancer                                          | Hypersensitivity               |
| NCT01485874                                 | Doxil        | Doxorubicin                        | Ovarian cancer                                         | Hypersensitivity               |
| NCT01961921,<br>NCT03862807                 | Patisiran    | RNAi, transthyretin-directed siRNA | Transthyretin Mediated Amyloidosis                     | Hypersensitivity               |
| NCT01770353,<br>NCT03524508,<br>NCT03207724 | Onivyde      | Irinotecan                         | Breast Cancer, Biliary Tract Cancer, Pancreatic Cancer | n/a                            |
| NCT02163720                                 | Caelyx       | Doxorubicin                        | Ovarian Cancer                                         | Hypersensitivity               |
| NCT04368728                                 | Comirnaty    | mRNA                               | SARS-CoV-2 Infection                                   | Anaphylaxis                    |
| NCT04405076                                 | Spikevax     | mRNA                               | SARS-CoV-2 Infection                                   | Anaphylaxis, Hypersensitivity  |
| n/a                                         | 2B3-201      | Methylprednisolone                 | Multiple Sclerosis                                     | n/a                            |
